# Intraoperative Circuit Leak Likely Caused by Surgical Prep

Yuki Kojima, D.D.S., Ph.D., Kazuya Hirabayashi, M.D., Ph.D., Tatsuhiro Oka, M.D., Ph.D.

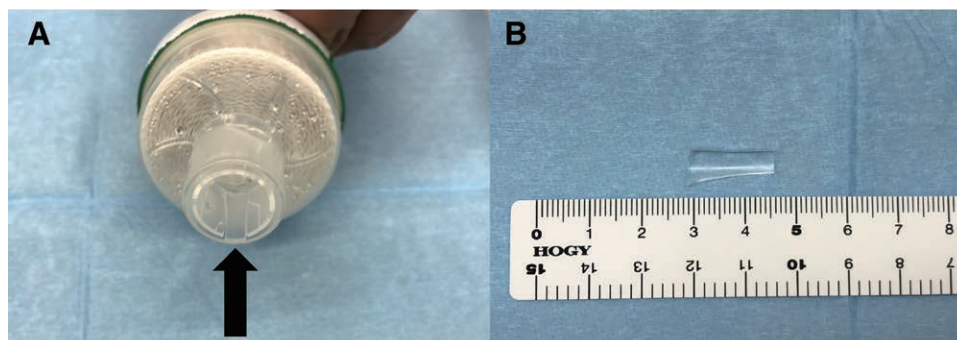

Five hours after intubation, a circuit leak was noticed. The care team checked the tracheal tube, respiratory circuit, and cuff pressure for potential leaks and found that there was a large crack on the heat and moisture exchanger (Japan Medicalnext, Japan) and a piece of debris beside the patient's head (fig. 1). After replacing the heat and moisture exchanger with a new one, no leak was detectable and surgery was completed uneventfully. This happened to an adult patient under general anesthesia with a nasal endotracheal tube for tongue resection. Preoperatively, the breathing circuit was checked and no circuit leak was found. The surgeon prepared the neck, face, proximal end of the endotracheal tube, and the distal portion of the circuit including the heat and moisture exchanger with 0.5% hexizac alcohol solution (usually disinfected with iodine solution in our hospital). The manufacturer reported that alcohol caused damage to the heat and moisture exchanger. However, the anesthesia and surgical team were not aware of this possibility and an alcohol-based disinfection prep was used. We believe that the heat and moisture exchanger damage (similar to other reports<sup>1,2</sup>) was caused by alcohol-based disinfection, and we were able to reproduce the damage (Supplemental Digital Content, video 1, <http://links.lww.com/ALN/C397>). The prevention of such damage is key and can be

achieved by (1) using a non-alcohol-based disinfection prep, (2) covering the tube and the distal portion of the circuit with a sterile sheet, and (3) placing a heat and moisture exchanger at the proximal end of each limb of the circuit.<sup>3</sup>

## Competing Interests

The authors declare no competing interests.

## Correspondence

Address correspondence to Dr. Kojima: [cojicoji1109@gmail.com](mailto:cojicoji1109@gmail.com)

## References

1. Prasad KK, Chen L: Complications related to the use of a heat and moisture exchanger. *ANESTHESIOLOGY* 1990; 72:958
2. Gordon PC: Breathing circuit failure due to surgical 'prep' solution. *Anaesthesia* 2004; 59:835–6
3. Lawes EG: Hidden hazards and dangers associated with the use of HME/filters in breathing circuits: Their effect on toxic metabolite production, pulse oximetry and airway resistance. *Br J Anaesth* 2003; 91:249–64

Supplemental Digital Content is available for this article. Direct URL citations appear in the printed text and are available in both the HTML and PDF versions of this article. Links to the digital files are provided in the HTML text of this article on the Journal's Web site ([www.anesthesiology.org](http://www.anesthesiology.org)).

Published online first on May 20, 2020. From the Department of Anesthesiology, Asahi General Hospital, Asahi City, Japan.

Copyright © 2020, the American Society of Anesthesiologists, Inc. All Rights Reserved. *Anesthesiology* 2020; 133:426. DOI: 10.1097/ALN.0000000000003382
